# Supplementary material for: Simultaneous recognition of dopamine and uric acid in real samples through highly sensitive new electrode fabricated using ZnO/carbon quantum dots: bio-imaging and theoretical studies
Source: Royal Society of Chemistry journal article supplement (doi:10.1039/d3an01467c), 2023-11-02
Supplement: d3an01467c1.pdf [file d3an01467c1.pdf]

# Simultaneous recognition of dopamine and uric acid in the real sample through highly sensitive new electrode fabricated by ZnO/carbon quantum dots: Bio-imaging and theoretical studies

Eduardo D. Tecuapa Flores<sup>b</sup>, Cristian B. Palacios Cabrera<sup>a</sup>, Alan J. Santiago Cuevas<sup>a</sup>, José G. Hernández<sup>c</sup>, Jayanthi Narayanan<sup>b</sup> and Pandiyan Thangarasu<sup>a\*</sup>

<sup>a</sup>Facultad de Química, Universidad Nacional Autónoma de México, Ciudad Universitaria, Coyoacán 04510, México D. F., México.

<sup>b</sup>División de Ingeniería en Nanotecnología, Universidad Politécnica del Valle de México, Av. Mexiquense s/n esquina Av. Universidad Politécnica, Tultitlán, Estado de México CP 54910, México.

<sup>c</sup>Centro Tecnológico, Facultad de Estudios Superiores (FES-Aragón), Universidad Nacional Autónoma de México (UNAM), Estado de México, CP 57130, México

## Supplementary materials

**Table S1.** XRD data of different of the samples.

| Crystal Planes | Diffraction peaks $2\theta$ [°] |          |               |                  |
|----------------|---------------------------------|----------|---------------|------------------|
|                | ZnO                             | ZnO-CQDs | JCPDS 36-1451 | $\Delta 2\theta$ |
| (100)          | 31.78                           | 31.78    | 31.77         | 0.01             |
| (002)          | 34.43                           | 34.43    | 34.44         | -0.01            |
| (101)          | 36.25                           | 36.27    | 36.25         | 0                |
| (102)          | 47.58                           | 47.48    | 47.53         | 0.05             |
| (110)          | 56.6                            | 56.62    | 56.6          | 0                |
| (113)          | 62.87                           | 62.85    | 62.6          | 0.27             |
| (200)          | 66.45                           | 66.39    | 66.38         | 0.07             |
| (112)          | 67.95                           | 67.95    | 67.96         | -0.01            |
| (201)          | 69.08                           | 69.08    | 69.1          | -0.02            |
| (004)          | 72.66                           | 72.52    | 72.56         | 0.1              |
| (202)          | 76.99                           | 76.89    | 76.95         | 0.04             |

**Table S2.** Elemental composition of samples.

| Element | CQDs  |       | ZnO   |       | ZnO/CQDs |       |
|---------|-------|-------|-------|-------|----------|-------|
|         | %W    | %T    | %W    | %T    | %W       | %T    |
| Zn      | -     | -     | 66.96 | 33.16 | 59.57    | 21.89 |
| C       | 56.84 | 63.4  | -     | -     | 34.85    | 69.72 |
| O       | 36.39 | 30.47 | 33.04 | 66.84 | 5.58     | 8.38  |
| N       | 6.18  | 5.92  | -     | -     | -        | -     |
| Total   | 100   | 100   | 100   | 100   | 100      | 100   |

**Table S3.** Bond lengths (Å) and bond angles (°) resulted in different spin states for [ZnO wurtzite, ZnO wurtzite-dopamine and ZnO wurtzite-Uric acid], using Functional B3LYP/DGDZVP level of theory.

|                    | DGDZVP                     |                             |                           |              |                                                      |                                                             |
|--------------------|----------------------------|-----------------------------|---------------------------|--------------|------------------------------------------------------|-------------------------------------------------------------|
| Bond length ligand | Dopamine (L <sup>1</sup> ) | Uric acid (L <sup>2</sup> ) | Bond length complexes (Å) | ZnO wurtzite | [ZnO wurtzite-Dopamine] in the corner of ZnO surface | [ZnO wurtzite-uric acid at the lateral plane of ZnO surface |
| O1-C1              |                            | 1.219                       | Zn1-Zn3                   | 2.625        | 2.621                                                | 2.819                                                       |
| C1-N1              | 1.466                      | 1.382                       | Zn1-O1                    | 2.012        | 1.972                                                | 1.907                                                       |
| C1-N2              | -                          | 1.426                       | Zn1-O2                    | 2.012        | -                                                    | 2.118                                                       |
|                    |                            |                             | Zn1-Zn2                   | 2.616        | -                                                    | -                                                           |
|                    |                            |                             | Zn2-Zn3                   | 2.626        | -                                                    | -                                                           |
|                    |                            |                             | Zn2-O1                    | 2.014        | -                                                    | -                                                           |
|                    |                            |                             | Zn2-O2                    | 2.014        | -                                                    | -                                                           |
|                    |                            |                             | Zn3-O1                    | 2.007        | -                                                    | -                                                           |
|                    |                            |                             | Zn3-O2                    | 2.007        | -                                                    | -                                                           |
| N1-H1              | 1.012                      | 1.011                       | Zn1-H1                    | -            | -                                                    | 2.810                                                       |
| N2-H2              | 1.012                      | 1.012                       | Zn1-O3                    | -            | -                                                    | 2.363                                                       |
| C1-H3              | 1.097                      |                             | Zn1-C4                    | -            | -                                                    | 2.887                                                       |
| C1-H4              | 1.097                      |                             | Zn1-C2                    | -            | -                                                    | 2.734                                                       |
|                    |                            |                             | Zn1-N1                    | -            | -                                                    | 1.973                                                       |
|                    |                            |                             | Zn2-O1                    | -            | 1.948                                                |                                                             |
|                    |                            |                             | Zn2-Zn3                   | -            | 2.219                                                |                                                             |
|                    |                            |                             | Zn2-O2                    | -            | 2.271                                                |                                                             |
|                    |                            |                             | Zn3-O2                    | -            | 1.927                                                |                                                             |
|                    |                            |                             | O2-N1                     | -            | 1.424                                                |                                                             |
|                    |                            |                             | O2-H1                     | -            | 1.950                                                |                                                             |
|                    |                            |                             | O2-C1                     | -            | 2.348                                                |                                                             |
|                    |                            |                             | O2-H2                     | -            | 2.538                                                |                                                             |
|                    |                            |                             | O2-H3                     | -            | 2.637                                                |                                                             |
|                    |                            |                             | <i>Bond Angle (o)</i>     |              |                                                      |                                                             |
|                    |                            |                             | O2-Zn2-O1                 | 82.2         | 82.3                                                 |                                                             |
|                    |                            |                             | O2-Zn3-O1                 | 82.5         | 92.4                                                 |                                                             |
|                    |                            |                             | Zn1-Zn2-O1                | 49.4         | 140.7                                                |                                                             |
|                    |                            |                             | O2-N1-H1                  |              | 104.6                                                |                                                             |
|                    |                            |                             | O2-N1-C1                  |              | 108.8                                                |                                                             |
|                    |                            |                             | O2-C1-H2                  |              | 86.8                                                 |                                                             |
|                    |                            |                             | O2-C1-H2                  |              | 92.7                                                 |                                                             |
|                    |                            |                             | O2-C1-C2                  |              | 145.0                                                |                                                             |
|                    |                            |                             | Zn2-O2-N1                 |              | 138.2                                                |                                                             |
|                    |                            |                             | Zn2-O2-c1                 |              | 111.2                                                |                                                             |
|                    |                            |                             | Zn2-O2-H1                 |              | 119.5                                                |                                                             |

|  |  |  |                 |      |       |       |
|--|--|--|-----------------|------|-------|-------|
|  |  |  | Zn3-O2-N1       |      | 133.9 |       |
|  |  |  | Zn3-O2-C1       |      | 142.0 |       |
|  |  |  | Zn3-O2-H1       |      | 142.2 |       |
|  |  |  | Zn3-O2-H2       |      | 150.0 |       |
|  |  |  | Zn3-O2-H3       |      | 118.3 |       |
|  |  |  | Zn1-O1-<br>Zn2  | 81.0 |       | 167.8 |
|  |  |  | Zn1-Zn3-<br>Zn2 | 60.1 |       | 92.6  |
|  |  |  | Zn1-O2-<br>Zn3  | 81.6 |       | 88.4  |
|  |  |  | Zn1-H1-<br>Zn3  |      |       | 62.2  |
|  |  |  | Zn1-O2-H1       |      |       | 127.0 |
|  |  |  | Zn1-N1-C1       |      |       | 145.0 |
|  |  |  | Zn1-N1-C2       |      |       | 107.7 |
|  |  |  | Zn1-C2-C4       |      |       | 81.7  |
|  |  |  | Zn1-C2-C3       |      |       | 155.3 |
|  |  |  | Zn1-C4-N3       |      |       | 177.0 |
|  |  |  | Zn1-O3-C4       |      |       | 101.4 |
|  |  |  | H1-Zn1-O3       |      |       | 87.4  |
|  |  |  | H1-Zn1-C4       |      |       | 97.4  |
|  |  |  | H1-Zn1-C2       |      |       | 106.7 |
|  |  |  | H1-Zn1-N1       |      |       | 111.8 |
|  |  |  | O2-Zn1-O3       | 82.3 |       | 101.2 |
|  |  |  | O2-Zn1-C4       |      |       | 113.3 |
|  |  |  | O2-Zn1-C2       |      |       | 121.6 |
|  |  |  | O2-Zn1-N1       |      |       | 121.2 |
|  |  |  | Zn3-Zn1-<br>O3  | 49.1 |       | 111.5 |
|  |  |  | Zn3-Zn1-<br>C4  |      |       | 135.7 |
|  |  |  | Zn3-Zn1-<br>C2  |      |       | 160.2 |
|  |  |  | Zn3-Zn1-<br>N1  |      |       | 159.0 |
|  |  |  | O1-Zn1-N1       |      |       | 144.4 |
|  |  |  | Zn1-O2-<br>Zn3  | 81.5 |       |       |

**Table S4.** Mulliken charges of L<sup>1</sup> and L<sup>2</sup> and its complexes of ZnO wurtzite with. Functional B3LYP/DGDZVP basis set.

| Atoms | Dopamine (DA) | Uric acid (UA) | Atoms | ZnO wurtzite | [ZnO wurtzite-Dopamine] in the perpendicular position of ZnO surface | [ZnO wurtzite-uric acid at the corner orientation of ZnO surface |
|-------|---------------|----------------|-------|--------------|----------------------------------------------------------------------|------------------------------------------------------------------|
| N1    | -0.707        | -0.459         | Zn1   | 0.656        | 0.223                                                                | 1.267                                                            |
| C1    | -0.317        | 0.303          | Zn2   | 0.656        | 0.395                                                                | 0.476                                                            |
| C2    | -0.517        | 0.106          | Zn3   | 0.656        | 0.605                                                                | 0.758                                                            |
| C3    | 0.318         | 0.398          | O1    | -0.984       | -0.822                                                               | -1.166                                                           |
| C4    | 0.241         | 0.314          | O2    | -0.984       | -0.600                                                               | -1.098                                                           |
| C5    | -0.378        | 0.377          | O3    |              | -0.610                                                               | -0.607                                                           |
| C6    | -0.282        |                | O4    |              | -0.560                                                               | -0.584                                                           |
| C7    | 0.293         |                | O5    |              |                                                                      | -0.803                                                           |
| C8    | -0.326        |                | N1    |              | -0.245                                                               | -0.903                                                           |
| O1    | -0.610        | -0.373         | C1    |              | -0.282                                                               | 1.067                                                            |
| O2    | -0.562        | -0.383         | C2    |              | -0.517                                                               | 0.053                                                            |
| O3    |               | -0.365         | C3    |              | 0.277                                                                | 0.753                                                            |
| H1    | 0.310         |                | C4    |              | 0.242                                                                | 0.866                                                            |
| H2    | 0.203         |                | C5    |              | -0.364                                                               | 1.044                                                            |
| H3    | 0.212         |                | C6    |              | -0.484                                                               |                                                                  |
| N2    |               | -0.493         | C7    |              | 0.296                                                                |                                                                  |
| N3    |               | -0.485         | C8    |              | -0.323                                                               |                                                                  |
| N4    |               | -0.476         | H1    |              | 0.342                                                                |                                                                  |
| O3    |               | -0.365         | H2    |              | 0.182                                                                |                                                                  |
|       |               |                | H3    |              | 0.217                                                                |                                                                  |
|       |               |                | N2    |              |                                                                      | -0.926                                                           |
|       |               |                | N3    |              |                                                                      | -0.972                                                           |
|       |               |                | N4    |              |                                                                      | -0.950                                                           |

**Table S5.** Electronic properties of the DA, UA, ZnO, [ZnO-DA and [ZnO-UA] CQDs.

| Functional: B3LYP/CEP-31g                               |           |           |           |                 |                         |                           |
|---------------------------------------------------------|-----------|-----------|-----------|-----------------|-------------------------|---------------------------|
| Compounds                                               | $E_{HF}$  | HOMO (eV) | LUMO (eV) | $\Delta E$ (eV) | Hardness ( $\eta$ , eV) | Softness ( $\sigma$ , eV) |
| Dopamine ( $L^1$ )                                      | -516.720  | -5.990    | -0.416    | 5.574           | 2.787                   | 0.359                     |
| Uric acid ( $L^2$ )                                     | -637.767  | -6.382    | -1.379    | 5.003           | 2.501                   | 0.400                     |
| ZnO wurtzite                                            | -5487.729 | -5.549    | -3.271    | 2.278           | 1.139                   | 0.878                     |
| ZnO wurtzite-Dopamine] in the corner of ZnO surface     | -6003.846 | -5.657    | -2.976    | 2.681           | 1.341                   | 0.746                     |
| wurtzite- uric acid at the lateral plane of ZnO surface | -6125.618 | -5.631    | -3.196    | 2.435           | 1.217                   | 0.821                     |

**Table S6.** TD-DFT spectral data of electronic transitions of ZnO with DA and UA at the plane with oscillator strength  $f > 0.0001$ .

| Wavelength (nm) | Osc. Strength (f) | ZnO wurtzite                                                                             | Character | Theory (nm) |
|-----------------|-------------------|------------------------------------------------------------------------------------------|-----------|-------------|
| 547.3           | 0.1825            | HOMO->LUMO (103%)                                                                        | MLCT      | 704         |
| 546.0           | 0.1842            | HOMO->LUMO+1 (102%)                                                                      | MLCT      |             |
| 284.3           | 0.0033            | HOMO-2->LUMO (45%)<br>HOMO-3->LUMO+1 (47%)<br>HOMO-3->LUMO+2 (3%)<br>HOMO-2->LUMO+3 (3%) | ILCT      | 283         |
| 252.5           | 0.0001            | HOMO-4->LUMO+1 (52%)<br>HOMO-5->LUMO (46%)                                               | ILCT      | 263         |
| 247.3           | 0.0331            | HOMO->LUMO+2 (60%)<br>HOMO-4->LUMO (15%)<br>HOMO-5->LUMO+1 (13%)<br>HOMO-6->LUMO+1 (9%)  | ILCT      |             |
| 246.4           | 0.0292            | HOMO->LUMO+3 (46%)<br>HOMO-5->LUMO (22%)<br>HOMO-4->LUMO+1 (16%)<br>HOMO-6->LUMO (13%)   | ILCT      |             |
| 239.3           | 0.0067            | HOMO-6->LUMO+1 (44%)<br>HOMO-4->LUMO (11%)<br>HOMO->LUMO+2 (33%)<br>HOMO-5->LUMO+1 (9%)  | ILCT      |             |
| 238.9           | 0.015             | HOMO->LUMO+3 (46%)<br>HOMO-6->LUMO (38%)<br>HOMO-5->LUMO (7%)<br>HOMO-4->LUMO+1 (7%)     | ILCT      |             |
| 226.6           | 0.1579            | HOMO-6->LUMO+1 (41%)<br>HOMO-5->LUMO+1 (23%)<br>HOMO-4->LUMO (23%)                       | ILCT      | 232         |

|        |        |                                                                                                                                        |      |      |
|--------|--------|----------------------------------------------------------------------------------------------------------------------------------------|------|------|
|        |        | HOMO->LUMO+2 (5%)<br>HOMO->LUMO+1 (4%)<br>HOMO-6->LUMO (3%)                                                                            |      |      |
| 226.3  | 0.1513 | HOMO-6->LUMO (42%)<br>HOMO-5->LUMO (22%)<br>HOMO-4->LUMO+1 (21%)<br>HOMO->LUMO+3 (6%)<br>HOMO->LUMO (4%)<br>HOMO-6->LUMO+1 (3%)        | ILCT |      |
| 206.7  | 0.0001 | HOMO-5->LUMO+1 (46%)<br>HOMO-4->LUMO (43%)<br>HOMO->LUMO+5 (6%)                                                                        | ILCT |      |
| 178.1  | 0.0266 | HOMO-2->LUMO+3 (35%)<br>HOMO->LUMO+4 (33%)<br>HOMO-3->LUMO+2 (27%)                                                                     | ILCT |      |
| 164.1  | 0.2571 | HOMO->LUMO+4 (60%)<br>HOMO-2->LUMO+3 (12%)<br>HOMO-3->LUMO+2 (11%)<br>HOMO-1->LUMO+5 (9%)                                              | ILCT |      |
| 146.3  | 0.0288 | HOMO-6->LUMO+2 (42%)<br>HOMO-5->LUMO+2 (26%)<br>HOMO-4->LUMO+3 (21%)<br>HOMO-3->LUMO+4 (6%)                                            | ILCT |      |
| 145.9  | 0.0313 | HOMO-6->LUMO+3 (37%)<br>HOMO-5->LUMO+3 (26%)<br>HOMO-4->LUMO+2 (21%)<br>HOMO-7->LUMO+1 (2%)<br>HOMO-2->LUMO+4 (8%)                     | ILCT |      |
| 142.9  | 0.0023 | HOMO-7->LUMO+1 (51%)<br>HOMO-6->LUMO+3 (18%)<br>HOMO-9->LUMO (7%)<br>HOMO-8->LUMO+1 (6%)<br>HOMO-20->LUMO (5%)<br>HOMO-19->LUMO+1 (4%) | ILCT |      |
|        |        | <b>ZnO wurtzite-Dopamine] at<br/>the parallel plane of ZnO<br/>surface</b>                                                             |      |      |
| 1433.5 | 0.0096 | HOMO->LUMO (89%)<br>HOMO->LUMO (8%)<br>HOMO-1->LUMO (2%)                                                                               | MLCT | 1421 |
| 854.9  | 0.0184 | HOMO->LUMO (44%)<br>HOMO-1->LUMO (35%)<br>HOMO->LUMO+1 (10%)<br>HOMO->LUMO (7%)<br>HOMO-2->LUMO (4%)                                   | MLCT | 859  |
| 535.1  | 0.0843 | HOMO->LUMO+1 (51%)<br>HOMO->LUMO (22%)<br>HOMO-2->LUMO (14%)<br>HOMO-1->LUMO (5%)<br>HOMO->LUMO (2%)                                   | MLCT | 534  |

|       |        |                                                                                                                                                                            |      |     |
|-------|--------|----------------------------------------------------------------------------------------------------------------------------------------------------------------------------|------|-----|
|       |        | HOMO-2->LUMO+1 (2%)<br>HOMO-1->LUMO (2%)                                                                                                                                   |      |     |
| 529.0 | 0.0109 | HOMO-3->LUMO (41%)<br>HOMO-2->LUMO (26%)<br>HOMO-2->LUMO+1 (15%)<br>HOMO-1->LUMO (7%)<br>HOMO->LUMO (4%)<br>HOMO-1->LUMO (3%)                                              | MLCT |     |
| 464.4 | 0.0769 | HOMO-1->LUMO (42%)<br>HOMO-2->LUMO (15%)<br>HOMO-2->LUMO (12%)<br>HOMO->LUMO+1 (12%)<br>HOMO-3->LUMO (6%)<br>HOMO-2->LUMO+1 (5%)<br>HOMO-1->LUMO (4%)<br>HOMO->LUMO (2%)   | MLCT | 464 |
| 457.4 | 0.0003 | HOMO-2->LUMO (59%)<br>HOMO-1->LUMO (20%)<br>HOMO-1->LUMO (11%)<br>HOMO-2->LUMO+1 (3%)<br>HOMO-5->LUMO (2%)<br>HOMO-3->LUMO (2%)                                            | MLCT |     |
| 451.5 | 0.0448 | HOMO-2->LUMO (32%)<br>HOMO-1->LUMO (27%)<br>HOMO-2->LUMO+1 (16%)<br>HOMO-1->LUMO (8%)<br>HOMO->LUMO (7%)<br>HOMO-3->LUMO (5%)<br>HOMO-1->LUMO+1 (3%)                       | MLCT |     |
| 442.4 | 0.0487 | HOMO-1->LUMO (25%)<br>HOMO-2->LUMO (20%)<br>HOMO->LUMO+1 (21%)<br>HOMO->LUMO (10%)<br>HOMO-2->LUMO (8%)<br>HOMO-2->LUMO+1 (6%)<br>HOMO-1->LUMO (4%)<br>HOMO-1->LUMO+1 (3%) | MLCT |     |
| 413.8 | 0.0181 | HOMO-1->LUMO+1 (84%)<br>HOMO-3->LUMO (4%)<br>HOMO-4->LUMO (4%)<br>HOMO-4->LUMO+1 (2%)<br>HOMO-2->LUMO+1 (2%)                                                               | MLCT |     |
| 410.9 | 0.0123 | HOMO-4->LUMO (53%)<br>HOMO-5->LUMO (32%)<br>HOMO-1->LUMO+1 (4%)<br>HOMO-3->LUMO (3%)<br>HOMO-5->LUMO (2%)                                                                  | MLCT | 409 |
| 399.4 | 0.0984 | HOMO-2->LUMO+1 (40%)<br>HOMO-3->LUMO (27%)<br>HOMO-4->LUMO (16%)<br>HOMO-5->LUMO(A) (8%)                                                                                   | MLCT |     |

|       |        |                                                                                                                                                                                      |      |     |
|-------|--------|--------------------------------------------------------------------------------------------------------------------------------------------------------------------------------------|------|-----|
|       |        | HOMO->LUMO (2%)<br>HOMO->LUMO+1 (2%)                                                                                                                                                 |      |     |
| 390.4 | 0.051  | HOMO-5->LUMO (45%)<br>HOMO-4->LUMO (19%)<br>HOMO-4->LUMO+1 (10%)<br>HOMO-3->LUMO (9%)<br>HOMO-2->LUMO+1 (9%)<br>HOMO->LUMO (2%)                                                      | MLCT |     |
| 361.8 | 0.0055 | HOMO-4->LUMO+1 (84%)<br>HOMO-5->LUMO (8%)<br>HOMO-4->LUMO (3%)                                                                                                                       | MLCT |     |
| 306.9 | 0.0031 | HOMO-5->LUMO (64%)<br>HOMO-6->LUMO (22%)<br>HOMO-5->LUMO+1 (10%)                                                                                                                     | MLCT |     |
| 299.3 | 0.0041 | HOMO->LUMO+2 (98%)                                                                                                                                                                   | ILCT |     |
| 298.5 | 0.0035 | HOMO-6->LUMO+1 (68%)<br>HOMO-6->LUMO (19%)<br>HOMO-7->LUMO (9%)                                                                                                                      | ILCT |     |
| 280.2 | 0.0026 | HOMO-4->LUMO+1 (28%)<br>HOMO-3->LUMO+2 (28%)<br>HOMO-1->LUMO+3 (15%)<br>HOMO-2->LUMO+2 (13%)<br>HOMO-7->LUMO (4%)<br>HOMO-6->LUMO (3%)<br>HOMO-6->LUMO+1 (3%)<br>HOMO-1->LUMO+2 (2%) | ILCT |     |
| 280.1 | 0.0191 | HOMO-7->LUMO (33%)<br>HOMO-6->LUMO+1 (25%)<br>HOMO-6->LUMO (24%)<br>HOMO-4->LUMO+1 (4%)<br>HOMO-3->LUMO+2 (4%)<br>HOMO-2->LUMO+2 (2%)<br>HOMO-8->LUMO+1 (2%)<br>HOMO-1->LUMO+3 (2%)  | ILCT |     |
| 272.4 | 0.0193 | HOMO->LUMO+3 (47%)<br>HOMO->LUMO+4 (28%)<br>HOMO->LUMO+5 (10%)<br>HOMO->LUMO+5 (6%)<br>HOMO-1->LUMO+3 (2%)                                                                           | ILCT |     |
| 264.9 | 0.073  | HOMO->LUMO+5 (75%)<br>HOMO->LUMO+3 (11%)<br>HOMO->LUMO+6 (4%)<br>HOMO-1->LUMO+5 (2%)                                                                                                 | ILCT | 263 |
| 260.4 | 0.0021 | HOMO->LUMO+2 (97%)                                                                                                                                                                   | ILCT |     |
| 255.6 | 0.0583 | HOMO-1->LUMO+2 (39%)<br>HOMO-2->LUMO+1 (29%)<br>HOMO-1->LUMO+1 (10%)<br>HOMO-4->LUMO+2 (8%)<br>HOMO-3->LUMO+3 (8%)<br>HOMO->LUMO+2 (2%)                                              | ILCT |     |



|        |        |                                                                                                                                                                                                       |      |     |
|--------|--------|-------------------------------------------------------------------------------------------------------------------------------------------------------------------------------------------------------|------|-----|
| 242.1  | 0.0187 | HOMO->LUMO+3 (21%)<br>HOMO->LUMO+4 (15%)<br>HOMO->LUMO+6 (14%)<br>HOMO-8->LUMO (14%),<br>HOMO->LUMO+5 (11%)<br>HOMO-9->LUMO (5%)<br>HOMO-1->LUMO+3 (4%)<br>HOMO-11->LUMO (2%),<br>HOMO-8->LUMO+1 (2%) | ILCT |     |
| 240.9  | 0.0372 | HOMO->LUMO+6 (29%)<br>HOMO->LUMO+4 (16%)<br>HOMO-8->LUMO (15%)<br>HOMO->LUMO+5 (14%)<br>HOMO-1->LUMO+3 (3%)<br>HOMO->LUMO+6 (3%)<br>HOMO-9->LUMO (2%)<br>HOMO-1->LUMO+4 (2%)<br>HOMO-1->LUMO+5 (2%)   | ILCT | 243 |
|        |        | <b>ZnO wurtzite- uric acid at the corner plane of ZnO surface</b>                                                                                                                                     |      |     |
| 629.9  | 0.0026 | HOMO->LUMO (98%)                                                                                                                                                                                      | MLCT | 657 |
| 470.2  | 0.18   | HOMO-1->LUMO (97%)<br>HOMO-12->LUMO (2%)                                                                                                                                                              | MLCT | 476 |
| 405.9  | 0.0063 | HOMO-2->LUMO (92%)<br>HOMO-3->LUMO (6%)                                                                                                                                                               | MLCT |     |
| 326.7  | 0.0006 | HOMO-3->LUMO (94%)<br>HOMO-2->LUMO (6%)                                                                                                                                                               | MLCT |     |
| 309.8  | 0.0932 | HOMO->LUMO+1 (86%)<br>HOMO-4->LUMO (7%)<br>HOMO-1->LUMO+1 (4%)                                                                                                                                        | MLCT | 314 |
| 298.4  | 0.0185 | HOMO-1->LUMO+1 (95%)<br>HOMO->LUMO+1 (4%)                                                                                                                                                             | MLCT |     |
| 276.9  | 0.0014 | HOMO-5->LUMO (81%)<br>HOMO-9->LUMO (11%)<br>HOMO-10->LUMO (2%)<br>HOMO-8->LUMO (2%)                                                                                                                   | ILCT |     |
| 257.9  | 0.0108 | HOMO->LUMO+3 (41%)<br>HOMO-7->LUMO (37%)<br>HOMO-10->LUMO (6%)<br>HOMO-8->LUMO (7%)<br>HOMO-5->LUMO (5%)                                                                                              | ILCT |     |
| 255.8  | 0.0247 | HOMO-7->LUMO (48%)<br>HOMO->LUMO+3 (26%)<br>HOMO-6->LUMO (12%)<br>HOMO-8->LUMO (6%)<br>HOMO->LUMO+2 (6%)                                                                                              | ILCT |     |
| 255.08 | 0.0164 | HOMO->LUMO+3 (26%)<br>HOMO-8->LUMO (22%)<br>HOMO-6->LUMO (19%)                                                                                                                                        | ILCT | 255 |

|       |        |                                                                                                                                                   |      |     |
|-------|--------|---------------------------------------------------------------------------------------------------------------------------------------------------|------|-----|
|       |        | HOMO-10->LUMO (13%)<br>HOMO-9->LUMO (8%)<br>HOMO-5->LUMO (7%)                                                                                     |      |     |
| 253.8 | 0.1368 | HOMO->LUMO+2 (84%)<br>HOMO-6->LUMO (6%)<br>HOMO->LUMO+3 (2%)                                                                                      | ILCT |     |
| 252.4 | 0.0097 | HOMO-6->LUMO (61%)<br>HOMO-9->LUMO (8%)<br>HOMO-7->LUMO (8%)<br>HOMO-8->LUMO (7%)<br>HOMO-10->LUMO (5%)<br>HOMO->LUMO+2 (5%)<br>HOMO-5->LUMO (2%) | ILCT |     |
| 249.4 | 0.0136 | HOMO-8->LUMO (48%)<br>HOMO-9->LUMO (30%)<br>HOMO-11->LUMO (6%)<br>HOMO-10->LUMO (6%)<br>HOMO-6->LUMO (2%)<br>HOMO-5->LUMO (2%)                    | ILCT |     |
| 236.9 | 0.0335 | HOMO-11->LUMO (28%)<br>HOMO-1->LUMO+3 (27%)<br>HOMO-10->LUMO (20%)<br>HOMO-1->LUMO+2 (15%)<br>HOMO-8->LUMO (5%)<br>HOMO-7->LUMO (2%)              | ILCT |     |
| 236.8 | 0.005  | HOMO-1->LUMO+2 (84%)<br>HOMO-11->LUMO (5%)<br>HOMO-10->LUMO (5%)<br>HOMO-1->LUMO+3 (4%)                                                           | ILCT |     |
| 236.8 | 0.0096 | HOMO-10->LUMO (37%)<br>HOMO-9->LUMO (35%)<br>HOMO-11->LUMO (14%)<br>HOMO-1->LUMO+3 (10%)                                                          | ILCT |     |
| 230.2 | 0.2987 | HOMO-1->LUMO+3 (51%)<br>HOMO-11->LUMO (34%)<br>HOMO-12->LUMO (7%)                                                                                 | ILCT | 232 |
| 217.8 | 0.0338 | HOMO->LUMO+4 (73%)<br>HOMO-1->LUMO+4 (15%)<br>HOMO->LUMO+5 (5%)<br>HOMO->LUMO+6 (5%)                                                              | ILCT | 222 |
| 217.6 | 0.0056 | HOMO->LUMO+5 (53%)<br>HOMO->LUMO+6 (33%)<br>HOMO->LUMO+4 (8%)                                                                                     | ILCT |     |
| 215.1 | 0.1305 | HOMO-12->LUMO (84%)<br>HOMO-11->LUMO (8%)<br>HOMO-1->LUMO+5 (2%)                                                                                  | ILCT |     |
| 187.5 | 0.1045 | HOMO->LUMO+7 (30%)<br>HOMO-3->LUMO+3 (23%)<br>HOMO-6->LUMO+1 (20%)<br>HOMO-13->LUMO (7%)                                                          | ILCT |     |

|  |  |                                                                |  |  |
|--|--|----------------------------------------------------------------|--|--|
|  |  | HOMO-7->LUMO+1 (7%)<br>HOMO-14->LUMO (5%)<br>HOMO->LUMO+8 (3%) |  |  |
|--|--|----------------------------------------------------------------|--|--|

**Table S7.** TD-DFT spectra of [ZnO-DA] and [ZnO-UA] calculated at B3LYP functional with basis set: DGDZVP at gaseous state.

|                            | $\lambda_1$ | $\lambda_2$ | $\lambda_3$ | $\lambda_4$ | $\lambda_5$ | $\lambda_6$ | $\lambda_7$ |
|----------------------------|-------------|-------------|-------------|-------------|-------------|-------------|-------------|
| ZnO wurtzite               | 232         | 263         | 283         | 704         |             |             |             |
| ZnO wurtzite-<br>Dopamine  | 243         | 263         | 409         | 464         | 534         | 859         | 1421        |
| ZnO wurtzite- uric<br>acid | 222         | 232         | 255         | 314         | 476         | 657         |             |

**Table S8.** Electrochemical data resulted with respective to SHE for the electrodes

|                                | CPE/CQDs (8:2)        | CPE/ZnO NPs (8:2)     |
|--------------------------------|-----------------------|-----------------------|
| $E_{pa}$                       | 0.39                  | 0.44                  |
| $E_{pc}$                       | 0.14                  | 0.08                  |
| $\Delta E_p$                   | 0.25                  | 0.36                  |
| $E_{1/2}$                      | 0.125                 | 0.18                  |
| $R_{CT}$ ( $\Omega$ )          | 184                   | 341                   |
| $\Gamma$ (nM cm <sup>2</sup> ) | 5.55                  | 2.23                  |
| $k_{app}$ (cm/s)               | $4.10 \times 10^{-3}$ | $2.21 \times 10^{-3}$ |
| Area (cm <sup>2</sup> )        | $1.33 \times 10^{-1}$ | $5.66 \times 10^{-2}$ |

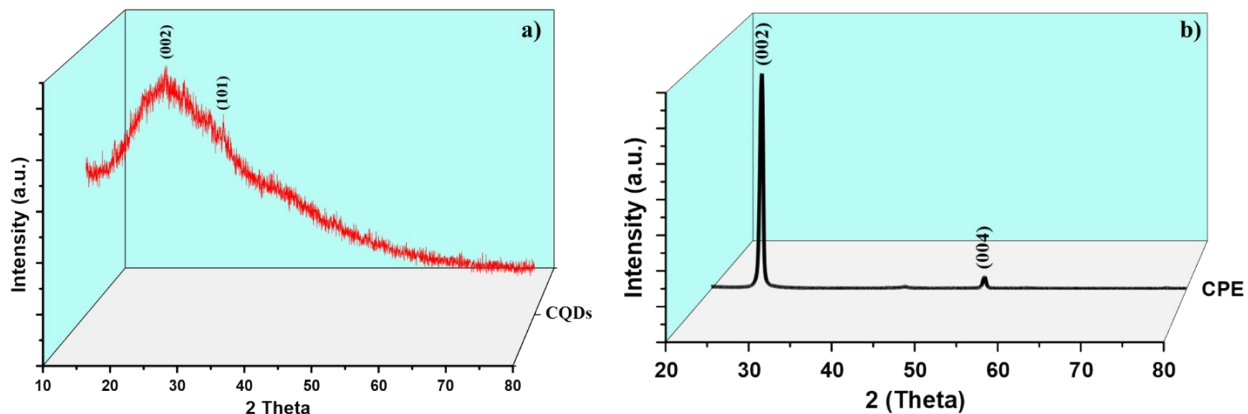

**Fig. S1.** XRD pattern: **a)** CQDs and **b)** CPE

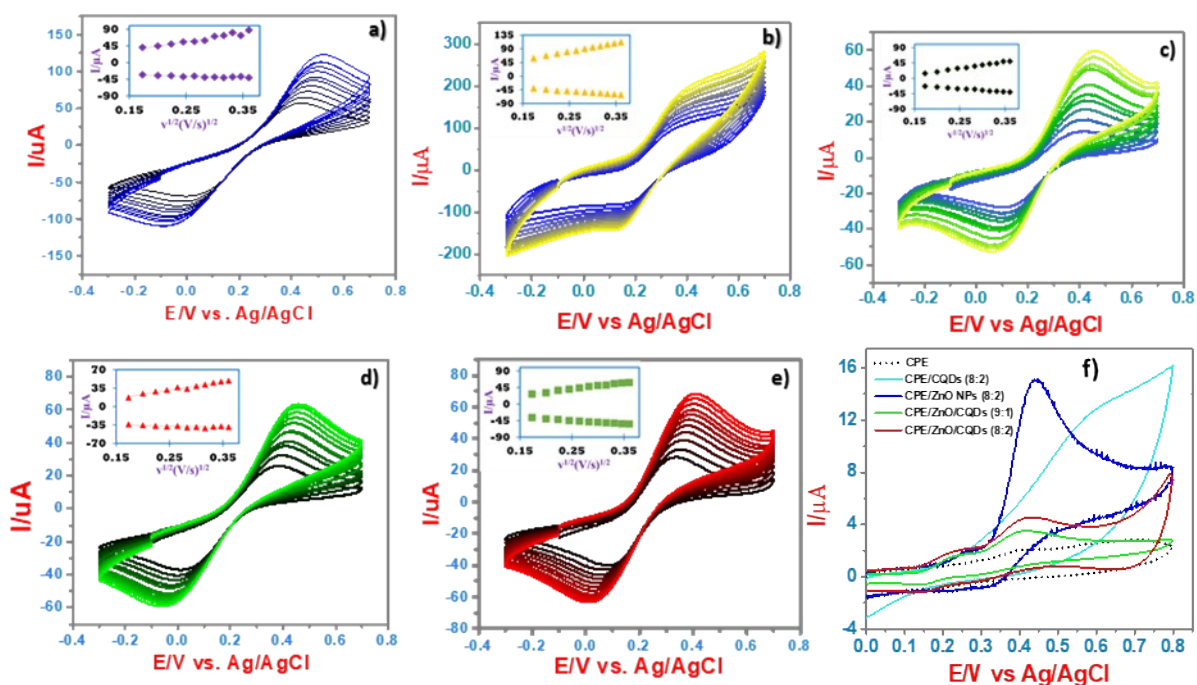

**Fig. S2.** **a)** CPE: CV at different scan rates ( $v$ ); **b)** CPE/CQDs (8:2): CV at different scan rates ( $v$ ); **c)** CPE/ZnO NPs (8:2): CV at different scan rates ( $v$ ); **d)** CPE/ZnO/CQDs (9:1): CV at different scan rates ( $v$ ); **e)** CPE/ZnO/CQDs (8:2): CV at different scan rates ( $v$ ); **f)** CV for DA (50  $\mu\text{M}$ ) and UA (500  $\mu\text{M}$ ) using CPE, CPE/CQDs (8:2), CPE/ZnO NPs (8:2), CPE/ZnO/CQDs (9:1), and CPE/ZnO/CQDs (8:2): B-R buffer (pH 7.0, 0.04 M); scan rate: 50 mV/s

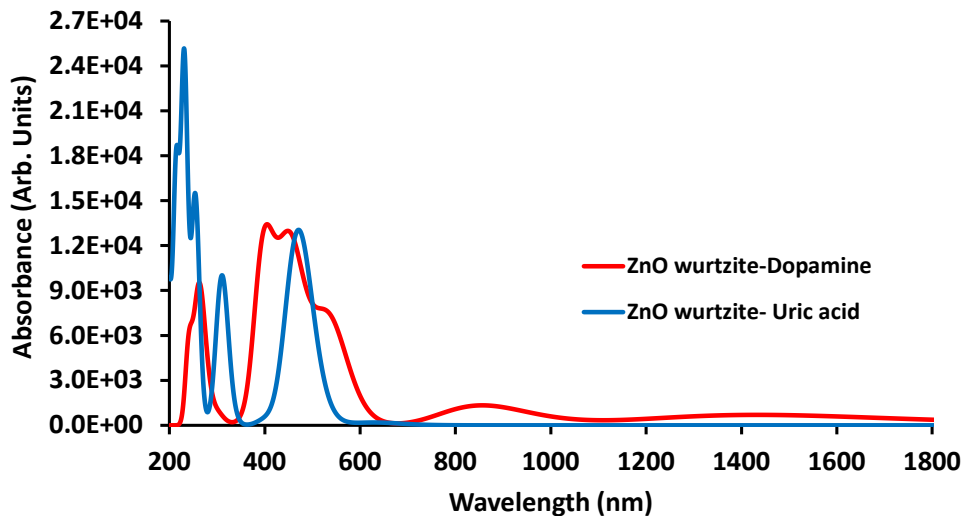

**Figure. S3.** TD-DFT spectra of with dopamine (DA), uric acid (UA), [ZnO-DA] at the parallel plane surface to ZnO and [ZnO-UA] in the corner position with ZnO at b3lyp/dgdzvp basis set at gaseous state.

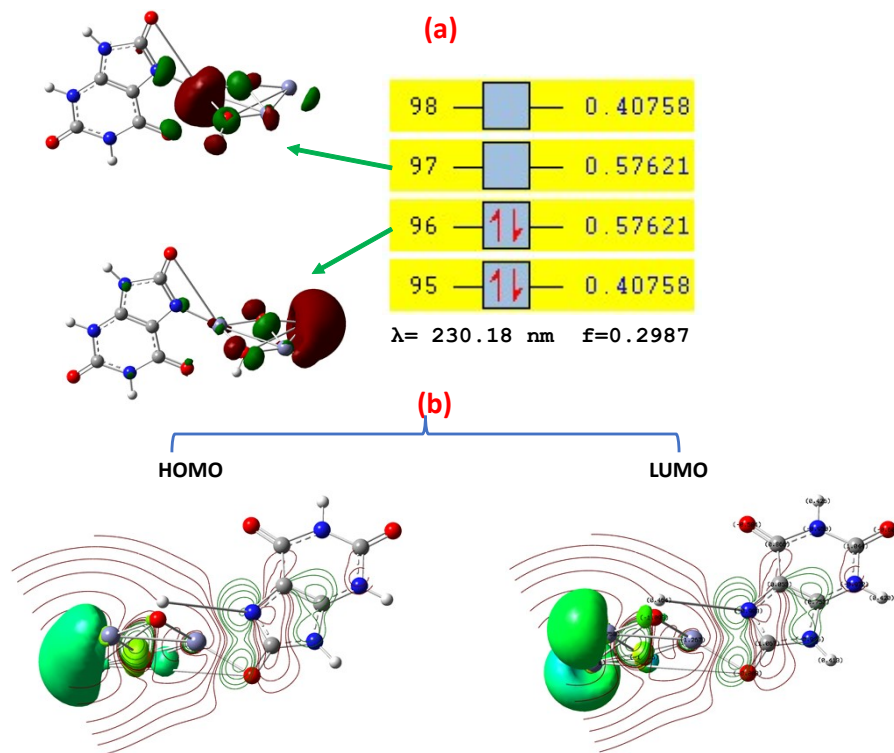

**Figure. S4** (a) NTOs at B3LYP/DGDZVP basis set, orbital 96 (particle), and orbital 97 (hole) for [ZnO-UA], excited state number 19 at  $S = 0$ . (b) Electron density isosurface for [ZnO-UA] at gaseous state: the code of color for the structure C (grey), H (white), N (blue), O (red) and Zn (gray/lavender), and (contour 0.05 e  $\text{\AA}^{-3}$ ), HOMO and LUMO determined by B3LYP/DGDZVP: HOMO and LUMO contour plots (isosurface value = 0.05 au).

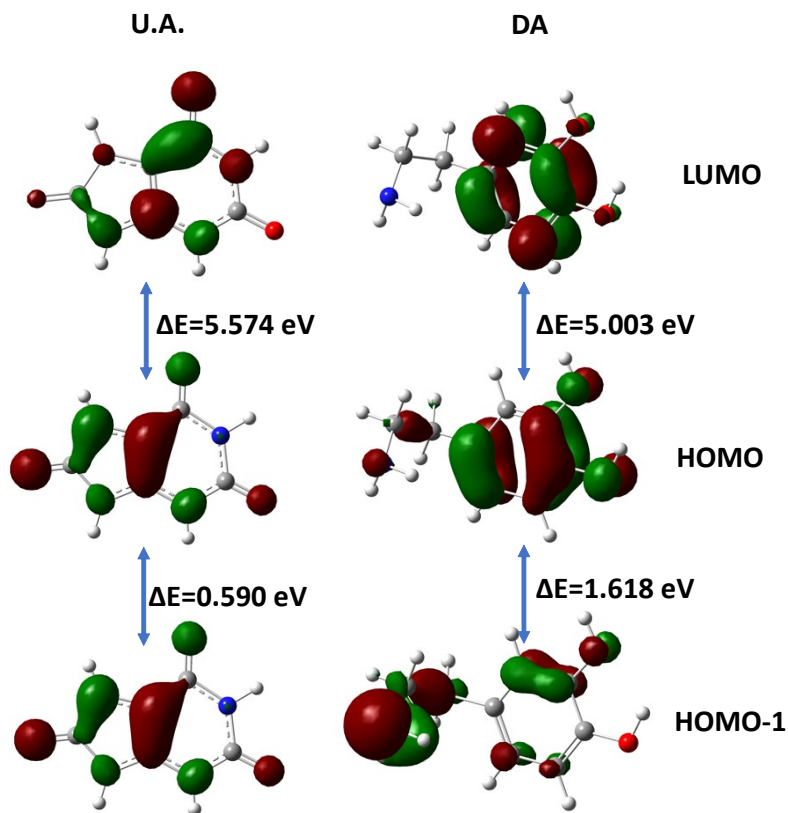

**Figure. S5.** Molecular orbital HOMO-LUMO of a) DA and b) UA at gaseous state.

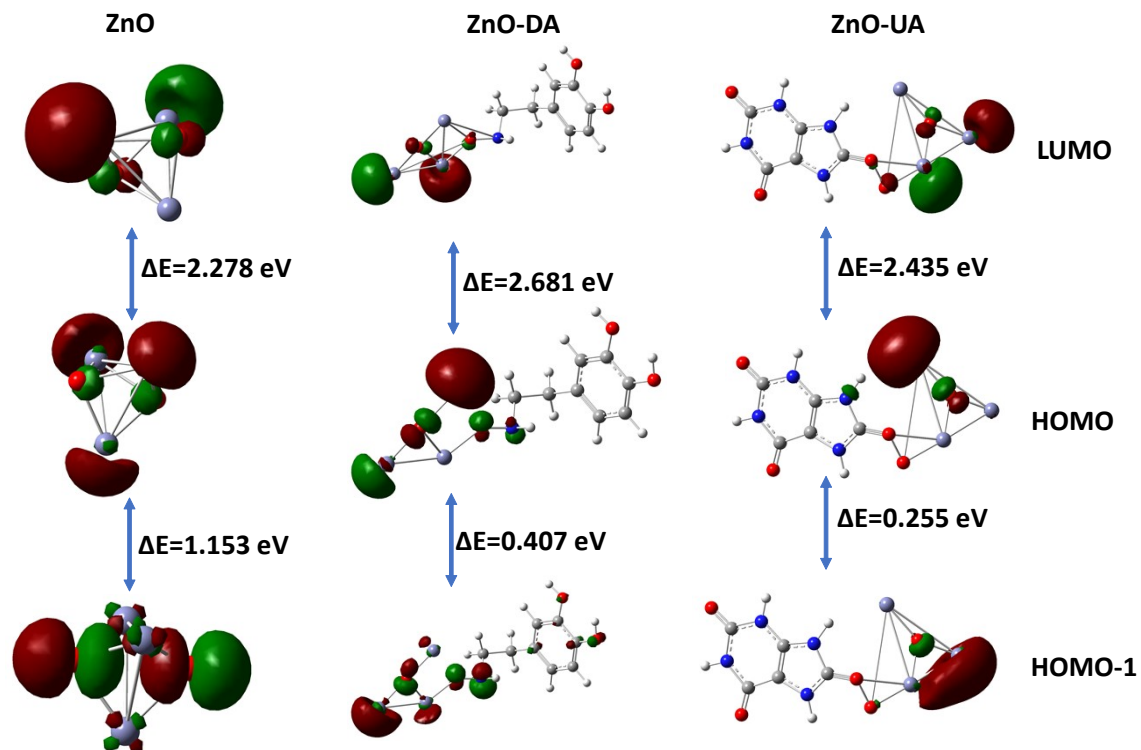

**Fig. S6.** Molecular orbital HOMO-LUMO of a) ZnO-DA and b) ZnO-UA at gaseous state.

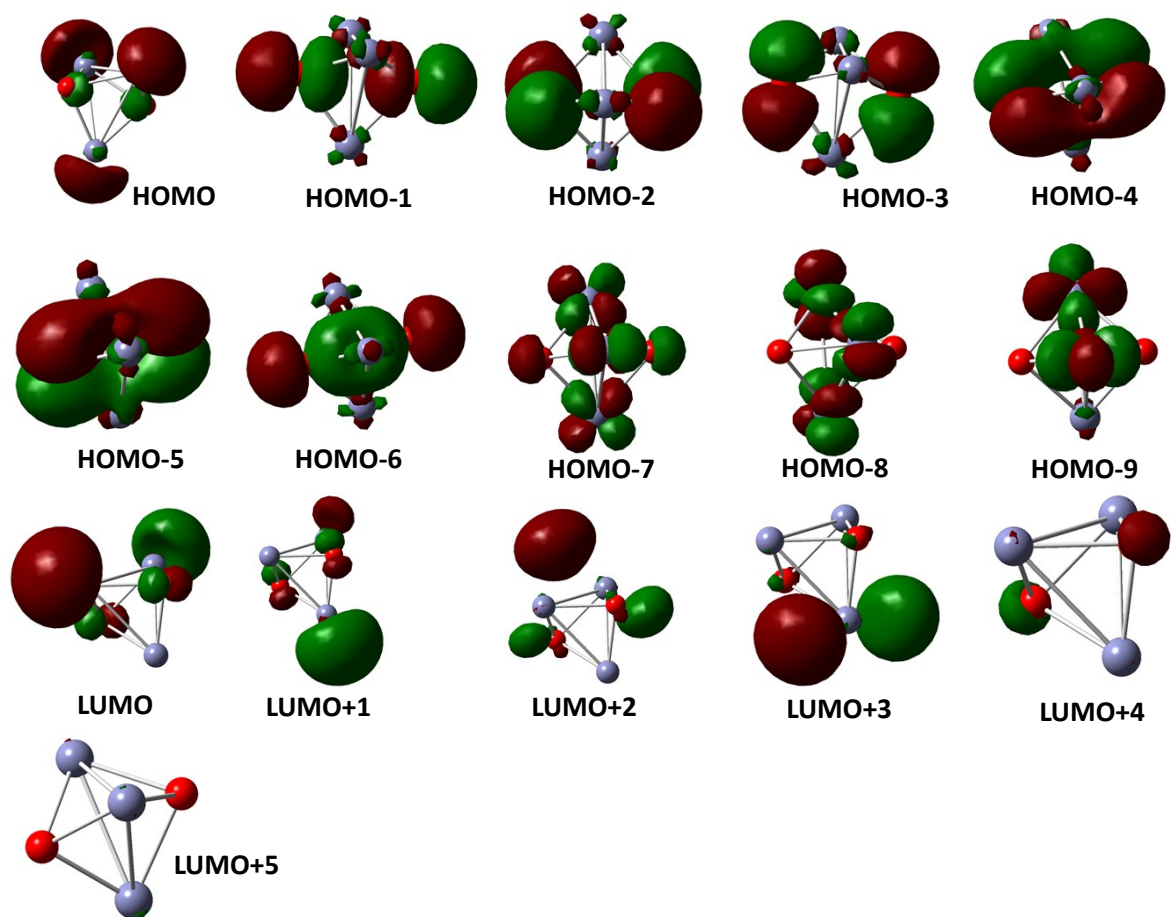

**Figure. S7.** Frontier molecular orbitals of ZnO (HOMOs and LUMOs) analysis:

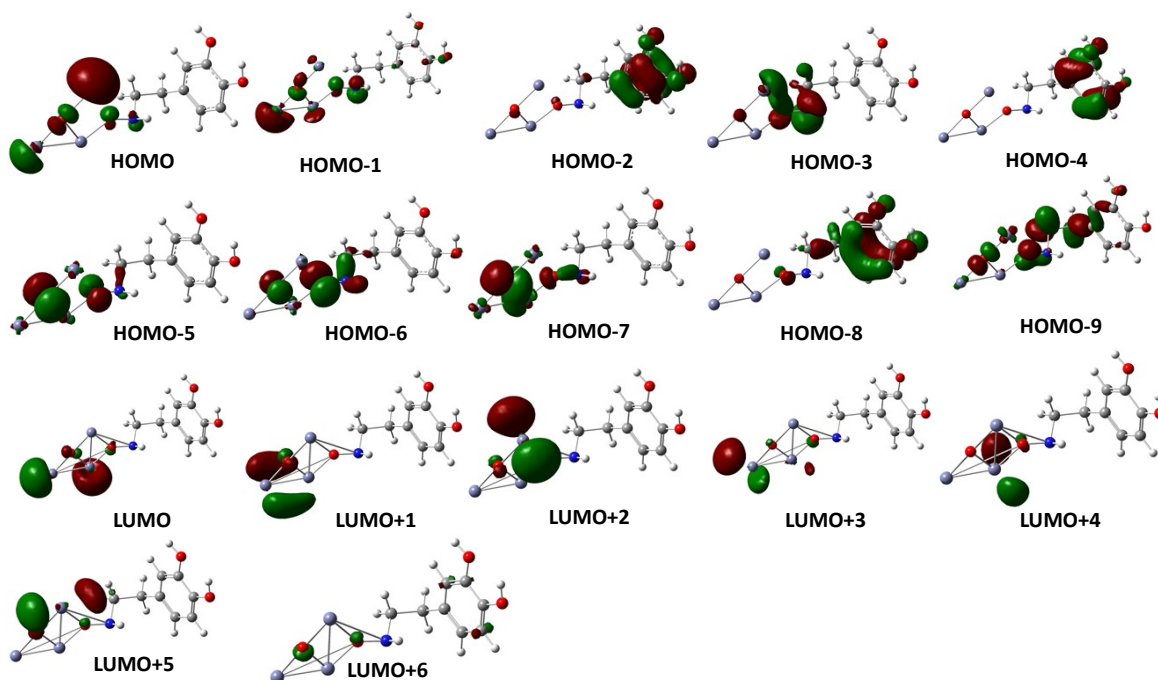

**Figure. S8.** Frontier molecular orbitals of [ZnO-DA] (HOMOs and LUMOs) analysis.

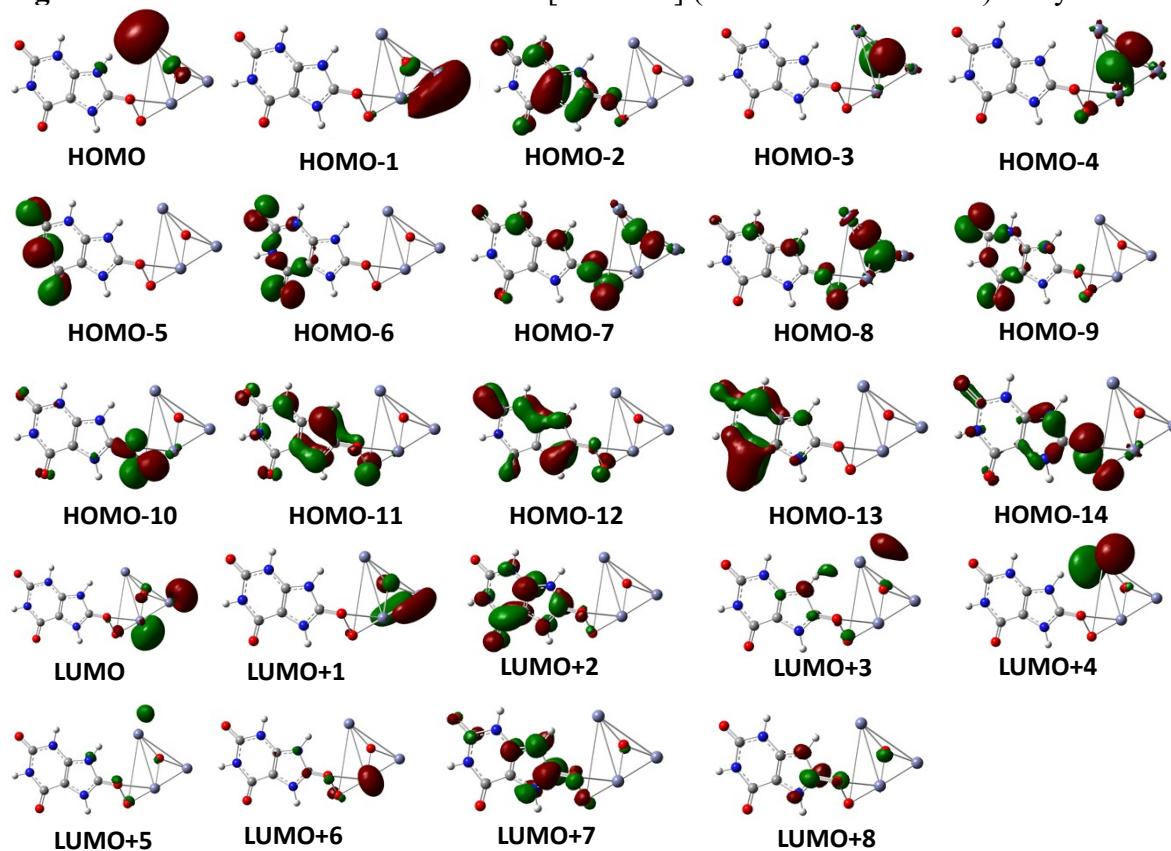

**Figure. S9.** Frontier molecular orbitals of [ZnO-UA] (HOMOs and LUMOs) analysis.



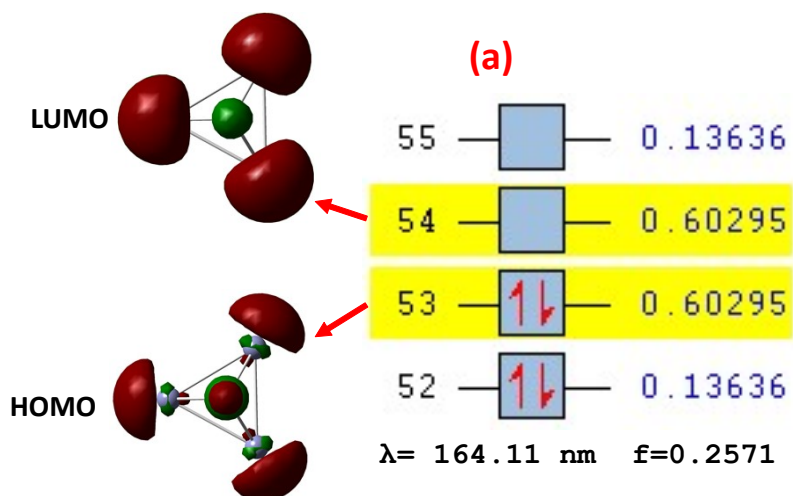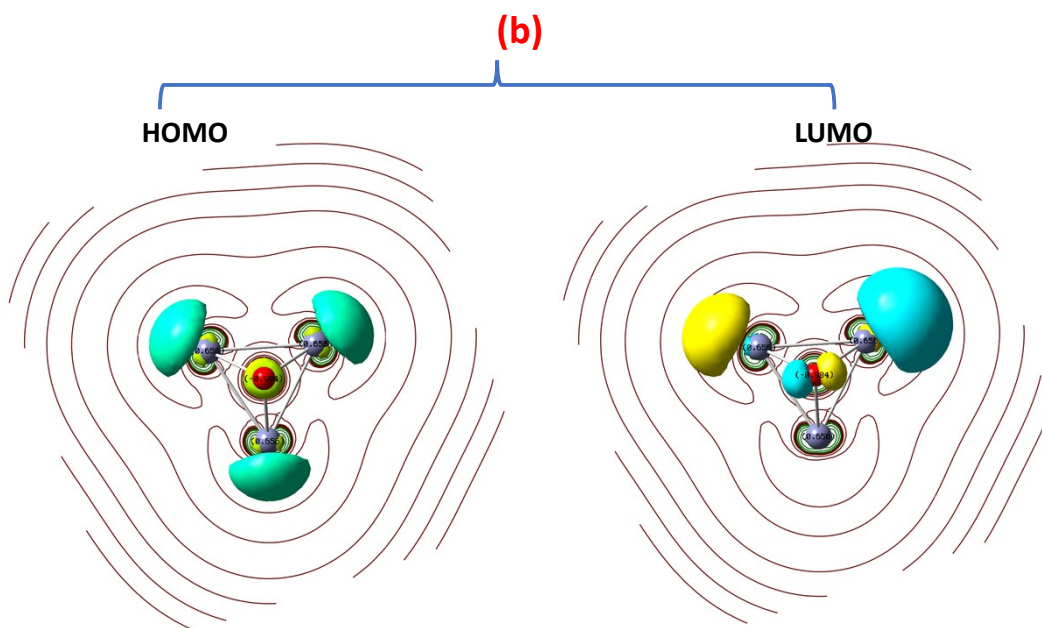

**Figure. S10** (a) NTOs at B3LYP/DGDZVP basis set, orbital 53 (particle), and orbital 54 (hole) for [ZnO], excited state number 23 at  $S = 0$ . (b) Electron density isosurface for [ZnO] at gaseous state: the code of color for the structure C (grey), H (white), N (blue), O (red) and Zn (gray/lavender), and (contour  $0.05 \text{ e } \text{\AA}^{-3}$ ), HOMO and LUMO determined by B3LYP/DGDZVP: HOMO and LUMO contour plots (isosurface value =  $0.05 \text{ au}$ ).
